# Supplementary material for: Fine Mapping and Evolution of the Major Sex Determining Region in Turbot (Scophthalmus maximus)
Source: PubMed Central journal article supplement (PMC4199694; doi:10.1534/g3.114.012328), 2014-08-07
Supplement: supp_g3.114.012328_FigureS1.pdf [file supp_g3.114.012328_FigureS1.pdf]

**Figure S1 Crossing-over along LG5 in turbot (*S. maximus*) families.** Genetic markers are ordered according to the LG5 consensus genetic map (Figure 1); M: males; F: female; S: single crossover event between Z and W chromosomes; D: double crossover; N: no crossover; Lacking genotypes have been coloured with that of the adjacent markers for a better representation of crossovers.

| DF family     |               |            | Sma-E79       | SmaUSC-E30    | <i>atp11b</i> | <i>sox2</i> | <i>fkbp3</i> | <i>dlg1</i> | Sma-USC247    | Sma1-152INRA  | YSKr50        | YSKr54        | <i>dmrta2</i> | Sma-USC12     | <i>amh</i> | Sma-E254      | Crossover |
|---------------|---------------|------------|---------------|---------------|---------------|-------------|--------------|-------------|---------------|---------------|---------------|---------------|---------------|---------------|------------|---------------|-----------|
| Offspring sex | M grandfather |            | 293295        | 179181        | AA            | CT          | GG           | CC          | 256258        | 094096        | 130136        | 174181        | 542542        | 334340        | CT         | 194194        |           |
|               | M grandmother |            | 293295        | 179179        | AA            | CC          | GG           | CA          | 256260        | 094096        | 128128        | 174181        | 542542        | 310346        | CC         | 194194        |           |
|               | F grandfather |            | 295310        | 181183        | AA            | CT          | GA           | CC          | 254256        | 092102        | 120130        | 174189        | 542556        | 330334        | CC         | 194241        |           |
|               | F grandmother |            | 295301        | 179179        | GA            | CT          | GG           | AA          | 252258        | 094096        | 130148        | 181181        | 542542        | 310332        | CT         | 194194        |           |
|               | father        |            | <b>295295</b> | <b>179179</b> | <b>AA</b>     | <b>CC</b>   | <b>GG</b>    | <b>CC</b>   | <b>256260</b> | <b>096096</b> | <b>128136</b> | <b>181174</b> | <b>542542</b> | <b>340346</b> | <b>CC</b>  | <b>194194</b> |           |
|               | mother (Z)    |            | <b>310</b>    | <b>181</b>    | <b>A</b>      | <b>T</b>    | <b>A</b>     | <b>C</b>    | <b>256</b>    | <b>92</b>     | <b>130</b>    | <b>189</b>    | <b>556</b>    | <b>334</b>    | <b>C</b>   | <b>241</b>    |           |
|               | mother (W)    |            | <b>295</b>    | <b>179</b>    | <b>G</b>      | <b>C</b>    | <b>G</b>     | <b>A</b>    | <b>258</b>    | <b>96</b>     | <b>148</b>    | <b>181</b>    | <b>542</b>    | <b>310</b>    | <b>T</b>   | <b>194</b>    |           |
| P3-A16        | M 1           | Centromere | 295310        | 179181        | AA            | CT          | GA           | CC          | 258260        | 096096        | 128148        | 174181        | 542542        | 310346        | CT         | 194194        | S         |
| P3-A20        | M 2           | Centromere | 295295        | 179181        | AA            | CT          | GA           | CC          | 256260        | 092096        | 128130        | 174189        | 542556        | 334346        | CC         | 194241        | S         |
| P3-A22        | M 3           | Centromere | 295310        | 179181        | AA            | CT          | GA           | CC          | 256256        | 092096        | 130136        | 181189        | 542556        | 334340        | CC         | 194241        | N         |
| P3-A26        | M 4           | Centromere | 295295        | 179179        | GA            | CC          | GG           | CA          | 256256        | 092096        | 130136        | 181189        | 542556        | 334340        |            | 194241        | S         |
| P3-A27        | M 5           | Centromere | 295310        | 179181        | AA            | CT          | GA           | CC          | 256256        | 092096        | 130136        | 181189        | 542542        | 310340        | CT         | 194194        | S         |
| P3-A34        | M 6           | Centromere | 295310        | 179181        | AA            | CT          | GA           | CC          | 256260        | 092096        | 128130        | 174189        | 542556        | 334346        | CC         | 194241        | N         |
| P3-A35        | M 7           | Centromere | 295295        | 179181        | AA            | CT          | GA           | CC          | 256260        | 092096        | 128130        | 174189        | 542556        | 334346        | CC         | 194241        | S         |
| P3-A47        | M 8           | Centromere | 295310        | 179181        | AA            | CT          | GA           | CC          | 256258        | 096096        | 136148        | 181181        | 542542        | 310340        | CT         | 194194        | S         |
| P3-A51        | M 9           | Centromere | 295310        | 179181        | AA            | CT          | GA           | CC          | 256258        | 096096        | 136148        | 181181        | 542542        | 310340        | CT         | 194194        | S         |
| P3-A56        | M 10          | Centromere | 295310        | 179181        | AA            | CT          | GA           | CC          | 256256        | 092096        | 130136        | 181181        | 542542        | 310340        | CT         | 194194        | S         |
| P3-A63        | M 11          | Centromere | 295310        | 179181        | AA            | CT          | GA           | CC          | 256256        | 092096        | 130136        | 181189        |               | 334340        |            | 194241        | N         |
| P3-A69        | M 12          | Centromere | 295310        | 179181        |               | CT          | GA           | CC          | 256260        | 092096        | 128130        |               | 542556        | 334346        |            | 194241        | N         |

|         |      |            |        |        |    |    |    |    |        |        |        |        |        |        |    |        |   |
|---------|------|------------|--------|--------|----|----|----|----|--------|--------|--------|--------|--------|--------|----|--------|---|
| P3-A82  | M 13 | Centromere | 295310 | 179181 | AA | CT | GA | CC | 256256 | 092096 | 130136 | 181189 |        | 334340 |    | 194241 | N |
| P3-A98  | M 14 | Centromere | 295295 | 179181 | AA |    | GA |    |        | 092096 |        |        |        | 334340 |    | 194194 | D |
| P3-A100 | M 15 | Centromere | 295310 | 179181 | AA | CT | GA | CC | 256258 | 096096 | 136148 |        | 542542 | 310340 | CT | 194194 | S |
| P3-A110 | M 16 | Centromere | 295310 | 179181 | AA | CT | GA | CC | 256258 | 096096 | 130136 | 181181 | 542542 | 310340 |    | 194241 | D |
| P3-A115 | M 17 | Centromere | 295310 | 179181 |    |    |    |    | 258260 | 096096 | 128148 | 174181 | 542542 | 310346 |    | 194194 | S |
| P3-A116 | M 18 | Centromere | 295295 | 179181 | AA | CT | GA | CC | 256256 | 092096 | 130136 | 181189 | 542542 | 310340 | CT | 194194 | D |
| P3-A119 | M 19 | Centromere | 295310 | 179181 |    | CT | GA | CC | 256256 | 092096 |        | 181189 |        | 334340 |    | 194241 | N |
| P3-A124 | M 20 | Centromere | 295310 | 179181 | AA | CT | GA | CC | 256260 | 092096 | 128130 | 174189 | 542556 | 334346 | CC | 194241 | N |
| P3-B9   | M 21 | Centromere | 295310 | 179181 | AA | CT | GA | CC | 256260 | 092096 | 128130 | 174189 | 542556 | 334346 | CC | 194241 | N |
| P3-B13  | M 22 | Centromere | 295310 | 179181 | AA | CT | GA | CC | 256258 | 096096 | 136148 | 181181 | 542542 | 310340 | CT | 194194 | S |
| P3-B15  | M 23 | Centromere | 295310 | 179181 | AA |    | GA | CC | 256260 | 092096 |        | 174189 | 542556 | 334346 |    | 194241 | N |
| P3-B18  | M 24 | Centromere | 295310 | 179181 | AA | CT | GA | CC | 256256 | 092096 | 130136 | 181189 | 542556 | 334340 | CC | 194241 | N |
| P3-B19  | M 25 | Centromere | 295310 | 179181 | AA | CT | GA | CC | 256258 | 096096 | 136148 | 181181 | 542542 | 310340 | CT | 194194 | S |
| P3-B21  | M 26 | Centromere | 295310 | 179181 |    | CT | GA | CC | 256256 | 092096 | 130136 | 181189 | 542556 | 334340 |    | 194241 | N |
| P3-B28  | M 27 | Centromere | 295295 | 179181 | AA | CT | GA | CC | 256260 | 092096 |        | 174189 | 542556 | 334346 | CC | 194241 | S |
| P3-B30  | M 28 | Centromere | 295295 | 179181 | AA | CT | GA | CC | 256256 | 092096 | 130136 | 181189 | 542556 | 334340 |    | 194241 | S |
| P3-B38  | M 29 | Centromere | 295310 | 179181 | AA | CT | GA | CC | 256256 | 092096 | 130136 | 181189 | 542556 | 334340 | CC | 194241 | N |
| P3-A22  | M 3  | Centromere | 295310 | 179181 | AA | CT | GA | CC | 256256 | 092096 | 130136 | 181189 | 542556 | 334340 | CC | 194241 | N |
| P3-B140 | M 30 | Centromere | 295295 | 179179 | GA | CC | GG | CA | 256256 | 092096 | 130136 | 181189 | 542556 | 334340 | CC | 194241 | S |
| P3-B144 | M 31 | Centromere | 295295 | 179181 | AA | CT | GA |    | 256256 | 092096 | 130136 | 181189 |        | 334340 |    | 194241 | S |
| P3-B145 | M 32 | Centromere | 295310 | 179181 | AA | CT | GA | CC | 256258 | 096096 | 136148 | 181181 |        | 310340 | CT | 194194 | S |
| P3-B146 | M 33 | Centromere | 295295 | 179181 | AA | CT | GA | CC | 256256 | 092096 | 130136 | 181189 | 542556 | 334340 | CC | 194194 | D |
| P3-B149 | M 34 | Centromere | 295310 | 179181 | AA | CT | GA |    | 256256 | 092096 | 130136 | 181189 | 542556 | 334340 | CC | 194241 | N |
| P3-B158 | M 35 | Centromere | 295295 | 179181 | AA |    | GA | CC | 256260 | 092096 |        | 174189 |        | 334346 | CC | 194241 | S |
| P3-B162 | M 36 | Centromere | 295310 | 179181 | AA | CT | GA | CC | 256256 | 092096 | 130136 | 181189 | 542556 | 334346 | CC | 194241 | N |
| P3-A1   | F1   | Centromere | 295295 | 179179 | GA | CC | GG | CA | 256258 | 096096 | 136148 | 181181 | 542542 | 310340 |    | 194241 | S |

|            |     |            |        |        |    |    |    |    |        |        |        |        |        |        |    |        |   |
|------------|-----|------------|--------|--------|----|----|----|----|--------|--------|--------|--------|--------|--------|----|--------|---|
| P3-A10     | F2  | Centromere | 295295 | 179179 | GA | CC | GG | CA | 256260 | 092096 | 128130 | 174189 | 542556 | 334346 | CC | 194241 | S |
| P3-A11     | F3  | Centromere | 295295 | 179179 | GA | CC | GG | CA | 256256 | 092096 | 130136 | 181189 |        | 334340 | CC | 194241 | S |
| P3-A12     | F4  | Centromere | 295295 | 179179 | GA | CC | GG | CA | 258260 | 096096 | 128148 | 174181 | 542542 | 310346 | CT | 194194 | N |
| P3-A17     | F5  | Centromere | 295295 | 179179 | GA |    | GG | CA | 258260 | 096096 | 128148 | 174181 | 542542 | 310340 | CT | 194194 | N |
| P3-A24     | F6  | Centromere | 295310 | 179179 | GA | CC | GG | CA | 258260 | 096096 | 128148 | 174181 | 542542 | 310346 |    | 194194 | S |
| P3-A25     | F7  | Centromere | 295295 | 179179 | GA | CC | GG | CA | 256256 | 092096 | 130136 | 181189 | 542556 | 334340 | CC | 194241 | S |
| P3-A32     | F8  | Centromere | 295295 | 179179 | GA | CC | GG | CA | 258260 | 096096 | 128148 | 174181 | 542542 | 310346 | CT | 194194 | N |
| P3-A49     | F9  | Centromere | 295295 | 179179 | GA | CC | GG | CA | 258260 |        | 128148 | 174181 |        | 310346 | CT | 194194 | N |
| P3-A55     | F10 | Centromere | 295295 | 179179 | GA | CC | GG | CA | 256258 | 096096 | 136148 | 181181 | 542542 | 310340 | CT | 194194 | N |
| P3-A57     | F11 | Centromere | 295295 | 179179 | GA | CC | GG | CA | 258260 | 096096 | 128148 | 174181 | 542556 | 334346 | CC | 194241 | S |
| P3-A61     | F12 | Centromere | 295310 | 179179 | GA | CC | GG | CA | 258260 | 096096 | 128148 | 174181 | 542542 | 310346 | CT | 194194 | S |
| P3-A67     | F13 | Centromere | 295295 | 179179 | GA |    | GA | CC | 256256 | 092096 | 130136 | 181189 |        | 334340 |    | 194241 | S |
| P3-A68     | F14 | Centromere | 295295 | 179179 | GA | CC | GG | CA | 256256 | 092096 | 130136 | 181189 | 542556 | 334340 | CC | 194241 | S |
| P3-A73     | F15 | Centromere | 295295 | 179179 | GA | CC | GG | CA | 256258 | 096096 | 136148 | 181181 | 542542 | 310340 | CT | 194194 | N |
| P3-A78     | F16 | Centromere | 295295 | 179179 | GA |    |    | CA | 258260 | 096096 | 128148 | 174181 | 542542 | 310346 |    | 194194 | N |
| P3-A79     | F17 | Centromere | 295310 | 179179 | GA | CC | GG | CA | 256258 | 096096 | 136148 | 181181 | 542542 | 310340 |    | 194194 | S |
| P3-A80     | F18 | Centromere | 295295 | 179179 | GA | CC | GG | CA | 256258 | 096096 | 136148 | 181181 | 542542 | 310340 | CC | 194241 | S |
| P3-A97     | F19 | Centromere | 295295 | 179179 | GA |    | GG | CA | 258260 | 096096 | 128148 | 174181 |        | 310346 |    | 194194 | N |
| P3-A99     | F20 | Centromere | 295295 | 179179 | GA | CC | GG | CA | 258260 | 096096 | 128148 | 174181 | 542556 | 334346 |    | 194241 | S |
| P3-A109    | F21 | Centromere | 295295 | 179179 | GA | CC | GG | CA | 256258 | 096096 | 136148 | 181181 | 542542 | 310340 | CT | 194194 | N |
| P3-A111    | F22 | Centromere | 295295 | 179179 | GA |    |    | CA | 256258 | 096096 | 136148 | 181181 | 542542 | 310340 | CC | 194241 | S |
| P3-A120(1) | F23 | Centromere | 295310 | 179179 | GA | CC | GG | CA | 258260 | 096096 | 128148 | 174181 | 542556 | 334346 | CC | 194241 | D |
| P3-A120(2) | F24 | Centromere |        | 179179 | GA | CC | GG | CA | 256258 | 096096 | 136148 | 181181 |        | 310340 |    | 194194 | N |
| P3-A122    | F25 | Centromere | 295295 | 179179 | GA | CC | GG | CA | 256258 | 096096 | 136148 | 181181 | 542542 | 310340 | CT | 194194 | N |
| P3-A126    | F26 | Centromere | 295295 | 179179 | GA | CC | GG | CA | 256256 | 092096 | 130136 | 181189 | 542556 | 334346 |    | 194241 | S |
| P3-A129    | F27 | Centromere | 295295 | 179179 | GA | CC | GG | CA | 256260 | 092096 | 128130 | 174189 | 542556 | 334346 | CC | 194241 | S |

|              |     |            |        |        |       |       |       |       |        |        |        |        |        |        |       |        |         |
|--------------|-----|------------|--------|--------|-------|-------|-------|-------|--------|--------|--------|--------|--------|--------|-------|--------|---------|
| P3-A135      | F28 | Centromere | 295295 | 179179 | GA    | CC    | GG    | CA    | 256258 | 096096 | 136148 | 181181 | 542542 | 310340 | CT    | 194194 | N       |
| P3-B8        | F29 | Centromere | 295295 | 179179 | GA    | CC    | GG    | CA    | 256256 | 092096 | 130136 | 181189 | 542556 | 334340 | CC    | 194241 | S       |
| P3-B23       | F30 | Centromere | 295295 | 179179 | GA    | CC    | GG    | CA    | 258260 | 096096 | 128148 | 174181 | 542542 | 310346 | CT    | 194194 | N       |
| P3-B33       | F31 | Centromere | 295310 | 179179 | GA    | CC    | GG    | CA    | 258260 | 096096 | 128148 | 174181 | 542542 | 310346 | CT    | 194194 | S       |
| P3-B37       | F32 | Centromere | 295295 | 179179 | GA    | CC    | GG    | CA    | 258260 | 096096 | 128148 | 174181 | 542542 | 310346 | CT    | 194194 | N       |
| P3-B64       | F33 | Centromere | 295295 | 179179 |       | CC    | GG    | CA    | 258260 | 096096 | 128148 | 174181 | 542556 | 334346 |       | 194241 | S       |
| P3-B81       | F34 | Centromere | 295295 | 179179 | GA    | CC    | GG    | CA    | 258260 | 096096 | 128148 | 174181 | 542542 | 310346 |       | 194194 | N       |
| P3-B114      | F35 | Centromere | 295295 | 179179 | GA    | CC    | GG    | CA    | 258260 | 096096 | 128148 | 174181 | 542542 | 310346 | CT    | 194194 | N       |
| P3-B136      | F36 | Centromere | 295295 | 179179 | GA    | CT    | GG    | CA    | 256258 | 096096 | 136148 | 181181 | 542556 | 334340 |       | 194241 | S       |
| P3-B137      | F37 | Centromere | 295295 | 179179 | GA    | CC    | GG    | CA    | 256260 | 092096 | 128130 | 174189 |        | 334346 | CT    | 194194 | D       |
| P3-B138      | F38 | Centromere |        | 179179 | GA    |       | GG    | CA    | 256260 | 092096 | 128130 | 174189 | 542556 | 334346 |       | 194194 | D       |
| P3-B139      | F39 | Centromere | 295295 | 179179 |       | CC    | GG    | CA    | 258260 | 096096 |        | 174181 | 542542 | 310346 |       | 194194 | N       |
| P3-B141      | F40 | Centromere | 295295 | 179181 | AA    | CT    | GA    |       | 256260 | 092096 | 128130 | 174189 | 542556 | 334346 |       | 194241 | S       |
| P3-B142      | F41 | Centromere | 295295 | 179179 | GA    | CC    | GG    | CA    | 256256 | 092096 | 136148 | 181189 | 542556 | 334340 |       | 194241 | S       |
| P3-B143      | F42 | Centromere | 295295 | 179179 | GA    | CC    | GG    | CA    | 256256 | 092096 | 130136 | 181189 | 542556 | 334340 | CC    | 194241 | S       |
| P3-B150      | F43 | Centromere | 295295 | 179179 | GA    | CC    | GG    | CA    | 256256 | 092096 | 130136 | 181189 | 542556 | 334340 |       | 194241 | S       |
| P3-B154      | F44 | Centromere | 295295 | 179179 | GA    | CC    | GG    | CA    | 258260 | 096096 |        | 174181 | 542542 | 310346 | CC    | 194241 | S       |
| P3-B155      | F45 | Centromere | 295295 | 179179 | GA    | CC    | GG    | CA    | 256258 | 096096 |        | 181181 |        | 310340 | CT    | 194194 | N       |
| P3-B159      | F46 | Centromere | 295295 | 179179 | GA    | CC    | GG    | CA    | 256258 | 096096 | 136148 | 181181 |        | 334340 | CC    | 194241 | S       |
| P3-B160      | F47 | Centromere | 295295 | 179179 |       |       | GG    | CA    | 256260 | 092096 | 128130 | 174189 |        | 334346 |       | 194241 | S       |
| P3-B164      | F48 | Centromere | 295295 | 179179 |       | CC    | GG    | CA    | 256258 | 096096 | 136148 | 181181 |        | 310340 |       | 194194 | N       |
| P3-B165      | F49 | Centromere | 295295 | 179179 | GA    | CC    | GG    | CA    | 256256 | 092096 | 130136 | 181189 |        | 334340 | CC    | 194241 | S       |
| recombinants |     |            | 16     | 3      | 3     | 3     | 4     | 3     | 19     | 24     | 21     | 24     | 26     | 31     | 23    | 37     | S=0,529 |
| RF           |     |            | 0,189  | 0,035  | 0,039 | 0,040 | 0,049 | 0,038 | 0,226  | 0,286  | 0,273  | 0,293  | 0,388  | 0,365  | 0,426 | 0,435  | N=0,388 |
| D=0,082      |     |            |        |        |       |       |       |       |        |        |        |        |        |        |       |        |         |

| QF6 family       |               | Sma-<br>E79 | dn<br>aj1 | SmaUSC-<br>E30 | dlg<br>1 | Sma-<br>USC65 | Sma-<br>USC247 | Cross<br>over |
|------------------|---------------|-------------|-----------|----------------|----------|---------------|----------------|---------------|
|                  | M grandfather |             | CT        | 183185         | CA       | 128128        | 256256         |               |
|                  | M grandmother |             |           |                |          |               |                |               |
| Offspring<br>sex | F grandfather | 297299      | CT        | 181183         | CC       |               | 256258         |               |
|                  | F grandmother | 295301      | CT        | 179183         | CA       |               | 256260         |               |
|                  | father        | 293303      | TT        | 183185         | CC       | 128128        | 256254         |               |
|                  | mother (Z)    | 297         | T         | 183            | C        | 138           | 258            |               |
|                  | mother (W)    | 295         | C         | 181            | A        | 128           | 256            |               |
| M1               | Centromere    | 293297      | TT        | 183183         | CA       | 128128        | 256256         | S             |
| M2               | Centromere    | 297303      | TT        | 183185         | CC       | 128138        | 256258         | N             |
| M3               | Centromere    | 297303      | TT        | 183185         | CC       | 128138        | 254258         | N             |
| M4               | Centromere    | 295303      | TT        | 183185         | CC       | 128138        | 256258         | S             |
| M5               | Centromere    | 293297      |           | 183183         | CC       | 128138        | 256256         | S             |
| M6               | Centromere    | 293297      | TT        | 183183         | CA       | 128128        | 254256         | S             |
| M7               | Centromere    | 293297      |           | 183185         | CC       | 128138        | 254258         | N             |
| M8               | Centromere    | 293297      | TT        | 183183         | CC       | 128138        | 254258         | N             |
| M9               | Centromere    | 293297      | TT        | 183183         | CC       | 128138        | 256258         | N             |
| M10              | Centromere    | 297303      | TT        | 183185         | CC       | 128138        | 256256         | S             |
| M11              | Centromere    | 297303      | TT        | 183185         | CC       | 128138        | 256258         | N             |
| M12              | Centromere    | 297303      | TT        | 183183         | CC       | 128138        | 256256         | S             |
| M13              | Centromere    | 293297      | TT        | 183183         | CC       | 128138        | 256258         | N             |
| M14              | Centromere    | 295303      |           | 181185         | CA       | 128128        | 254256         | S             |
| M15              | Centromere    | 293297      |           | 183183         | CC       | 128138        | 256256         | S             |
| M16              | Centromere    | 297303      | TT        | 183185         | CC       | 128138        | 254258         | N             |
| M17              | Centromere    | 293297      | TT        | 183183         | CC       | 128138        | 256258         | N             |
| M18              | Centromere    | 293297      |           | 183183         | CC       | 128138        | 256256         | S             |
| M19              | Centromere    | 293297      | TT        | 183183         | CC       | 128138        | 256256         | S             |
| M20              | Centromere    | 297303      | TT        | 183185         | CC       | 128138        | 254258         | N             |
| M21              | Centromere    | 293297      |           | 183183         | CC       | 128128        | 256256         | S             |
| M22              | Centromere    | 297303      | TT        | 183185         | CC       | 128138        | 254258         | N             |
| M23              | Centromere    | 297303      | TT        | 183185         | CC       | 128138        | 254258         | N             |
| M24              | Centromere    | 293295      | CT        | 181183         | CA       | 128128        | 256256         | S             |
| M25              | Centromere    | 295303      | CT        |                | CA       | 128128        | 256258         | S             |
| M26              | Centromere    | 297303      |           | 183185         | CC       | 128138        | 254258         | N             |
| M27              | Centromere    | 297303      | TT        | 183185         | CC       | 128138        | 254258         | N             |
| M28              | Centromere    | 293297      | TT        | 183183         | CC       | 128138        | 256256         | S             |
| M29              | Centromere    | 293297      | TT        | 183183         | CC       | 128138        | 256256         | N             |
| M30              | Centromere    | 293297      | TT        | 183183         | CC       | 128128        | 256256         | S             |
| M31              | Centromere    | 293295      | CT        | 181183         | CA       | 128128        | 256256         | S             |
| M32              | Centromere    | 297303      | TT        | 183185         | CC       | 128128        | 256256         | S             |
| M33              | Centromere    | 293297      | TT        | 183185         | CC       | 128138        | 254256         | S             |
| M34              | Centromere    | 293297      | TT        | 183183         | CC       | 128138        |                | N             |
| M35              | Centromere    | 297303      |           | 183185         | CC       | 128128        | 256256         | S             |
| M36              | Centromere    | 297303      |           | 183185         | CC       | 128138        | 254258         | N             |
| M37              | Centromere    | 293297      | TT        | 183183         | CA       | 128128        | 256256         | S             |
| M38              | Centromere    | 293297      | TT        | 183183         | CC       | 128138        | 254258         | N             |
| M39              | Centromere    | 293295      | TT        | 183183         | CC       | 128138        | 256258         | S             |
| M40              | Centromere    | 297303      | TT        | 183185         | CA       | 128128        | 254256         | S             |
| M41              | Centromere    | 297303      | TT        | 183183         | CC       | 128138        | 256256         | S             |
| M42              | Centromere    | 293295      | CT        | 181183         | CA       | 128128        | 254256         | S             |
| M43              | Centromere    | 297303      | TT        | 183185         | CC       | 128138        | 254258         | N             |
| M44              | Centromere    | 297303      | CT        | 181185         | CA       | 128128        | 256256         | S             |
| M45              | Centromere    | 293297      | TT        | 183185         | CC       | 128128        | 254256         | S             |
| M46              | Centromere    | 297303      | TT        | 183185         | CC       | 128128        | 256256         | S             |
| M47              | Centromere    | 293297      | TT        | 183183         | CC       | 128138        | 256258         | N             |
| M48              | Centromere    | 293297      | TT        | 183183         | CC       | 128138        | 256256         | S             |
| M49              | Centromere    | 293297      | TT        | 183183         | CC       | 128138        | 256258         | N             |

|           |            |        |     |        |     |        |        |              |
|-----------|------------|--------|-----|--------|-----|--------|--------|--------------|
| F1        | Centromere | 295303 |     | 181183 | CA  | 128128 | 256256 | N            |
| F2        | Centromere | 293295 | CT  | 181183 | CA  | 128128 | 256256 | N            |
| F3        | Centromere | 293295 |     | 181183 | CA  | 128128 | 256256 | N            |
| F4        | Centromere | 295303 | CT  | 181185 | CA  | 128128 | 254256 | N            |
| F5        | Centromere | 295303 | CT  | 181183 | CA  | 128128 | 256256 | N            |
| F6        | Centromere | 295303 | TT  | 183185 | CC  | 128138 | 254258 | S            |
| F7        | Centromere | 295303 | CT  | 181185 | CA  | 128128 | 254256 | N            |
| F8        | Centromere | 295303 | CT  | 181185 | CA  | 128128 | 254258 | S            |
| F9        | Centromere | 293295 | TT  | 183183 | CC  | 128138 | 256258 | S            |
| F10       | Centromere | 297303 |     | 181185 | CA  | 128128 | 254256 | S            |
| F11       | Centromere | 297303 | CT  | 181185 | CA  | 128128 | 254256 | S            |
| F12       | Centromere | 295303 | TT  | 183183 | CC  | 128138 | 256258 | S            |
| F13       | Centromere | 293295 | CT  | 181183 | CA  | 128128 | 256256 | N            |
| F14       | Centromere | 293295 | CT  | 181183 | CA  | 128128 | 256256 | N            |
| F15       | Centromere | 293295 | CT  | 181183 | CA  | 128128 | 256256 | N            |
| F16       | Centromere | 293295 | CT  | 181185 | CA  | 128128 | 254258 | S            |
| F17       | Centromere | 297303 | CT  | 181185 | CA  | 128128 | 254256 | S            |
| F18       | Centromere | 293295 | CT  | 181183 | CA  | 128128 | 256256 | N            |
| F19       | Centromere | 295303 | CT  | 181185 | CA  | 128128 | 256256 | N            |
| F20       | Centromere | 293297 |     | 181183 | CA  | 128128 | 256256 | S            |
| Recombina |            | 11     | 8   | 8      | 12  | 16     | 29     | S=0,4        |
| RF        |            | 0,159  | 0,1 | 0,118  | 0,1 | 0,232  | 0,420  | N=0,<br>D=0, |
