# Supplementary material for: Fine Mapping and Evolution of the Major Sex Determining Region in Turbot (Scophthalmus maximus)
Source: PubMed Central journal article supplement (PMC4199694; doi:10.1534/g3.114.012328), 2014-08-07
Supplement: supp_g3.114.012328_TableS1.pdf [file supp_g3.114.012328_TableS1.pdf]

**Table S1** Genes between the homologous turbot sequences of SmaUSC-E30 and SmaSNP\_31, at 6.06 Mb and 6.64 Mb, respectively, in the stickleback LGVIII chromosome.

| Ensembl Gene ID    | Gene Start (bp) | Gene End (bp) | Associated Gene Name |
|--------------------|-----------------|---------------|----------------------|
| ENSGACG00000006052 | 6057829         | 6066578       | <i>fxr1</i>          |
| ENSGACG00000006076 | 6068380         | 6070562       | <i>dnajc19</i>       |
| ENSGACG00000006099 | 6128772         | 6153394       |                      |
| ENSGACG00000006100 | 6157588         | 6158556       | <i>sox2</i>          |
| ENSGACG00000006104 | 6308502         | 6339588       | <i>atp11b</i>        |
| ENSGACG00000006125 | 6344114         | 6350026       | <i>mccc1</i>         |
| ENSGACG00000006138 | 6356136         | 6360741       | <i>kng1</i>          |
| ENSGACG00000006156 | 6364215         | 6377038       | <i>PIK3CA</i>        |
| ENSGACG00000006175 | 6384998         | 6388251       | <i>ZMAT3</i>         |
| ENSGACG00000006180 | 6394455         | 6397463       |                      |
| ENSGACG00000006189 | 6448564         | 6475804       | <i>LRRC7</i>         |
| ENSGACG00000006210 | 6485834         | 6533369       |                      |
| ENSGACG00000006216 | 6549844         | 6552127       |                      |
| ENSGACG00000006222 | 6557305         | 6563824       | <i>mfi2</i>          |
| ENSGACG00000006229 | 6565695         | 6568855       | <i>fkbp2</i>         |
| ENSGACG00000006237 | 6566121         | 6567033       |                      |
| ENSGACG00000006238 | 6569593         | 6572048       | <i>ncbp2</i>         |
| ENSGACG00000006258 | 6590103         | 6632830       |                      |
| ENSGACG00000006285 | 6647309         | 6655988       | <i>cp</i>            |
