# Supplementary material for: Fine Mapping and Evolution of the Major Sex Determining Region in Turbot (Scophthalmus maximus)
Source: PubMed Central journal article supplement (PMC4199694; doi:10.1534/g3.114.012328), 2014-08-07
Supplement: supp_g3.114.012328_TableS2.pdf [file supp_g3.114.012328_TableS2.pdf]

**Table S2 Primer pairs and gene regions selected for developing genetic markers at putative genes in the main turbot SD region.**

| Gene          | Accession number | Primers                                             | Region                                           | Amplicon size | SNPs detected |
|---------------|------------------|-----------------------------------------------------|--------------------------------------------------|---------------|---------------|
| <i>dnaj19</i> | KJ434933         | F: CATGGTGGCAGTGGGACT<br>R: TGGTTCAAACCCACCTCTGT    | First exon-<br>Third exon                        | 1,133         | 2             |
|               |                  | F: GCCGTGAAGCAGATGGAG<br>R: AGAAAAGTCTGGCGCTTGTG    | Second exon-<br>Third exon                       | 1,609         | 2             |
| <i>sox2</i>   | KJ434936         | F: AGGAAAGTCTCCTGGAAGGAA<br>R: CAGATGAAAAGTGGGAGACG | 3'UTR                                            | 662           | 2             |
| <i>atp11b</i> | KJ434932         | F: CAACATCTGCTTCACCTCGT<br>R: GGTGTCTTCTCCCATCAGGA  | 26 <sup>th</sup> exon –<br>27 <sup>th</sup> exon | 454           | none          |
|               |                  | F: GTCACGCCTTCGTCTTCTTC<br>R: GTTCCAAACGTCCAGTTTCC  | 27 <sup>th</sup> exon –<br>28 <sup>th</sup> exon | 1,172         | none          |
|               |                  | F: GGAAACTGGACGTTTGGAAC<br>R: CAGCTGCACGAACACAAAGT  | 28 <sup>th</sup> exon –<br>30 <sup>th</sup> exon | 952           | 3             |
|               |                  | F:AGACTCATTTCTGGACGTGGA<br>R: CACCACGTCTGGGAAAGAG   | 29 <sup>th</sup> exon –<br>30 <sup>th</sup> exon | 418           | 2             |
| <i>dlg1</i>   | KJ434935         | F: CAGGAAGAGACTCTGCTCACC<br>R: GCCATCTGGAGACGCTTTAT | Third exon –<br>Sixth exon                       | 1,871         | 3             |
|               |                  | F: TGACCTCATCTCCGAGTTCC<br>R: ATGAAAACAGCGATGGGATG  | Fourth exon –<br>Sixth exon                      | 1,273         | 2             |
|               |                  | F: TGACCTCATCTCCGAGTTCC<br>R: CGTGAACCGCTTGTTTCATTT | Fourth exon –<br>Seventh exon                    | 2,010         | 3             |
| <i>fkbp2</i>  | KJ434934         | F: CGAGAAGAGGAAGCTCGTCA<br>R: TGCCTTGTTGCTTTCATCAG  | First exon –<br>UTR3'                            | 1,646         | 10            |
| <i>ncbp2</i>  | KJ434931         | F: GCGTTGATCAGCGACTCCTA<br>R: CAGGCCGTCTTCTTGACTTT  | First exon –<br>Third exon                       | 845           | 2             |
|               |                  | F: CGTGGGAATCTCTCCTTCT<br>R: GAGTGCCATTGACGAAGC     | Second exon<br>– Fourth exon                     | 904           | none          |
|               |                  | F: ACGTGCAGACGCAGAACAC<br>R: AGTTTACCGTAGCCGCCTC    | Fourth exon –<br>Fifth exon                      | 1,145         | 5             |
