# Supplementary material for: Fine Mapping and Evolution of the Major Sex Determining Region in Turbot (Scophthalmus maximus)
Source: PubMed Central journal article supplement (PMC4199694; doi:10.1534/g3.114.012328), 2014-08-07
Supplement: supp_g3.114.012328_TableS3.pdf [file supp_g3.114.012328_TableS3.pdf]

Table S3 Statistical association between candidate gene-associated markers and sex at population and family level.

|               | Wild population |              | DF family    |              | QF6 family |              |
|---------------|-----------------|--------------|--------------|--------------|------------|--------------|
|               | Genotypic       | Allelic      | Genotypic    | Allelic      | Genotypic  | Allelic      |
| Sma-E79       | 0.138           | 0.056        | <b>0</b>     | <b>0</b>     | -          | -            |
| Sma-USC270    | 0.322           | 0.331        | -            | -            | -          | -            |
| <i>dnaj19</i> | 0.710           | 0.387        | -            | -            | <b>0</b>   | <b>0.003</b> |
| SmaUSC-E30    | 0.074           | 0.113        | <b>0</b>     | <b>0</b>     | <b>0</b>   | <b>0.001</b> |
| Sma-USC288    | 0.202           | 0.222        | -            | -            | -          | -            |
| <i>atp11b</i> | 0.322           | 0.623        | <b>0</b>     | <b>0</b>     | -          | -            |
| <i>sox2</i>   | 0.292           | 0.097        | <b>0</b>     | <b>0</b>     | -          | -            |
| <i>fkbp2</i>  | -               | -            | <b>0</b>     | <b>0</b>     | -          | -            |
| <i>ncbp2</i>  | 0.433           | 0.182        | -            | -            | -          | -            |
| <i>dlg1</i>   | 0.626           | 0.951        | <b>0</b>     | <b>0</b>     | <b>0</b>   | <b>0.001</b> |
| Sma-USC254    | 0.293           | 0.07         | -            | -            | -          | -            |
| Sma-USC65     | 0.070           | <b>0.038</b> | -            | -            | <b>0</b>   | <b>0.001</b> |
| Sma1-152INRA  | 0.375           | 0.237        | <b>0</b>     | <b>0.002</b> | -          | -            |
| Sma-USC191    | 0.493           | 0.226        | -            | -            | -          | -            |
| Sma-USC247    | 0.204           | 0.113        | <b>0.001</b> | <b>0</b>     | 0.180      | 0.248        |
| YSKr50        | 0.266           | 0.738        | <b>0.002</b> | <b>0.001</b> | -          | -            |
| YSKr54        | <b>0.011</b>    | <b>0.022</b> | <b>0.002</b> | <b>0.010</b> | -          | -            |
| <i>dmrta2</i> | 0.876           | 0.937        | 0.061        | 0.188        | -          | -            |
| Sma-USC198    | 0.216           | 0.647        | 0.053        | 0.044        | -          | -            |
| Sma-USC12     | 0.201           | 0.142        | 0.046        | 0.086        | -          | -            |
| YSKr178       | 0.086           | <b>0.031</b> | -            | -            | -          | -            |
| Sma-USC278    | 0.063           | <b>0.042</b> | -            | -            | -          | -            |
| Sma-USC88     | -               | -            | -            | -            | -          | -            |
| Sma-USC225    | -               | -            | <b>0</b>     | <b>0</b>     | -          | -            |
| Sma-USC202    | 0.147           | 0.081        | -            | -            | -          | -            |
| <i>amh</i>    | -               | -            | 0.394        | 0.771        | -          | -            |
| Sma-E254      | 0.323           | 0.300        | 0.172        | 0.283        | -          | -            |
| Sma-USC265    | 0.080           | 0.064        | -            | -            | -          | -            |
| Sma-USC10     | 0.361           | 0.064        | <b>0.003</b> | 0.236        | -          | -            |

P<0.05 in bold characters. Bonferroni correction ( $\alpha=0.05$ ;  $k=28$ ;  $P=0.0018$ ); - non informative markers
