# Supplementary material for: Fine Mapping and Evolution of the Major Sex Determining Region in Turbot (Scophthalmus maximus)
Source: PubMed Central journal article supplement (PMC4199694; doi:10.1534/g3.114.012328), 2014-08-07
Supplement: supp_g3.114.012328_TableS4.pdf [file supp_g3.114.012328_TableS4.pdf]

**Table S4 Comparative gene order of the mapped genes at the main SD region of turbot with regard to model Acanthopterygii fish genomes**

| LG5 CONSENSUS<br>MAP TURBOT |         | LGVIII STICKLEBACK |         | LG4 MEDAKA         |            | LG1 TETRAODON      |           | LG20 FUGU          |                 |
|-----------------------------|---------|--------------------|---------|--------------------|------------|--------------------|-----------|--------------------|-----------------|
| <i>dnaj19</i>               | 16.3 cM | <u><i>fxr1</i></u> | 6,06 Mb | <i>dlg1</i>        | 19,12 Mb   | <i>dlg1</i>        | 21,329 Mb | <u><i>fxr1</i></u> | Sc. 351: 111 Kb |
| <u><i>fxr1</i></u>          | 16.5cM  | <i>dnaj19</i>      | 6,06Mb  | <i>fkbp2</i>       | 19,14 Mb   | <i>fkbp2</i>       | 21,343 Mb | <i>dnaj19</i>      | Sc. 351: 124 Kb |
| <b>(SmaUSC-E30)</b>         |         |                    |         |                    |            |                    |           |                    |                 |
| <i>atp11b</i>               | 17.6 cM | <i>sox2</i>        | 6,15 Mb | <i>ncbp2</i>       | 19,14 Mb   | <i>ncbp2</i>       | 21,345 Mb | <i>sox2</i>        | Sc. 351: 191 Kb |
| <i>sox2</i>                 | 17.9cM  | <i>atp11b</i>      | 6,32 Mb | <u><i>cp</i></u>   | 19,30 Mb   | <u><i>cp</i></u>   | 21,403 Mb | <i>atp11b</i>      | Sc. 347: 67 Kb  |
| <i>fkbp2</i>                | 18.7 cM | <i>dlg1</i>        | 6,55 Mb | <i>atp11b</i>      | 19,59 Mb   | <i>atp11b</i>      | 21,551 Mb | <u><i>cp</i></u>   | Sc. 55: 45 Kb   |
| <i>ncbp2</i>                | 19.0cM  | <i>fkbp2</i>       | 6,56 Mb | <i>sox2</i>        | 19,85 Mb   | <i>sox2</i>        | 21,666 Mb | <i>ncbp2</i>       | Sc. 55: 121 Kb  |
| <i>dlg1</i>                 | 19.5 cM | <i>ncbp2</i>       | 6,57 Mb | <i>dnaj19</i>      | 19,99 MbSI | <i>dnaj19</i>      | 21,726 Mb | <i>fkbp2</i>       | Sc. 55: 125 Kb  |
| <u><i>cp</i></u>            | 19.5 cM | <u><i>cp</i></u>   | 6,64 Mb | <u><i>fxr1</i></u> | 19,99 Mb   | <u><i>fxr1</i></u> | 21,728 Mb | <i>dlg1</i>        | Sc.55: 139 Kb   |
| <b>(SmaSNP31)</b>           |         |                    |         |                    |            |                    |           |                    |                 |

*atp11b* (ATPase, class VI, type 11B), *cp* (ceruloplasmin), *dlg1* (discs, large (Drosophila) homolog 1), *dnaj19* (DnaJ (Hsp40) homolog, subfamily C, member 19), *fkbp2* (FK506 binding protein 2, 13kDa), *fxr1* (fragile X mental retardation, autosomal homolog 1), *ncbp2* (nuclear cap binding protein subunit 2, 20kDa), *sox2* (SRY (sex determining region Y)-box 2).
